1  
2  
3  
4  
5  
6  
7  
8  
9  
10  
11  
12  
13  
14  
15  
16  
17  
18  
19  
20  
21

MANUSCRIPT bioRxiv

Title: Exploiting the unwanted: sulphate reduction enables phosphate recovery from energy-rich sludge during anaerobic digestion

Running title: Phosphate recovery through sulphate reduction

**Celine Lippens, Jo De Vrieze**✉

Center for Microbial Ecology and Technology (CMET), Ghent University, Coupure Links 653, B-9000 Gent, Belgium

✉ Correspondence to: Jo De Vrieze, Ghent University; Faculty of Bioscience Engineering; Center for Microbial Ecology and Technology (CMET); Coupure Links 653; B-9000 Gent, Belgium; phone: +32 (0)9 264 59 76; fax: +32 (0)9 264 62 48; E-mail: Jo.DeVrieze@UGent.be; Webpage: [www.cmet.ugent.be](http://www.cmet.ugent.be).

22 **Abstract**

23 Anaerobic digestion is shifting from a single-purpose technology for renewable energy  
24 recovery from organic waste streams to a process for integrated resource recovery. The  
25 valorisation of high-rate energy- and phosphorus-rich sludge creates the opportunity for their  
26 combined recovery. This phosphate is present in a precipitated form in the sludge, and its  
27 release into the liquid phase is an important issue before recovery can be achieved. The  
28 objective of this research was to exploit the “unwanted” sulphate reduction process for the  
29 release of phosphate into the liquid phase during anaerobic digestion, thus, making it available  
30 for recovery. Two different treatments were considered, *i.e.*, a control digester and a digester to  
31 which sulphate was added, each operated in triplicate for a period of 119 days. The control  
32 digester showed stable methane production at  $628 \pm 103 \text{ mL CH}_4 \text{ L}^{-1} \text{ d}^{-1}$ , with a feedstock COD  
33 (chemical oxygen demand) conversion efficiency of  $89.5 \pm 14.6 \%$ . In contrast, the digester  
34 with sulphate addition showed a  $29.9 \pm 15.3 \%$  decrease in methane production, reaching an  
35 “inhibited steady state”, but phosphate release into the liquid phase increased with a factor 4.5,  
36 compared to the control digester. This inhibited steady state coincided with a clear shift from a  
37 Methanosaetaceae to a Methanosarcinaceae dominated methanogenic community. Overall, the  
38 sulphate reduction process allows phosphate release during the anaerobic digestion process,  
39 yet, at the cost of a reduced methane production rate.

40

41 **Keywords:** Biogas, methanogenesis, resource recovery, sulphate reducing bacteria

42

## 43 **1. Introduction**

44 Anaerobic digestion (AD) has been a key technology for the recovery of renewable energy from  
45 organic waste streams for decades. Initially, however, the main purpose of AD was the  
46 stabilisation of organic waste streams to avoid environmental pollution (Acosta and De Vrieze  
47 2018). The ability to use the energy-rich methane in a combined heat and power (CHP) unit for  
48 electricity and heat production quickly allowed the transition of AD from a waste treatment  
49 technology to an integrated system for renewable energy recovery. Different organic waste  
50 streams, such as animal manure (Holm-Nielsen et al. 2009), waste activated sludge (Appels et  
51 al. 2008), the organic fraction of municipal solid waste (Hartmann and Ahring 2006) have been  
52 valorised through AD, either as such or through co-digestion with other waste streams (Björn  
53 et al. 2017, Mata-Alvarez et al. 2011). In the framework of the current transition from “waste-  
54 to-energy” to “waste-to-resource”, the recovery of nutrients, in addition to energy, has become  
55 more and more pressing to (1) safeguard natural resources and (2) ensure long-term economic  
56 viability of the AD process.

57 The recovery of nutrients in refined products through AD has been demonstrated through  
58 numerous technologies in multiple configurations. Stripping/absorption is a well-established  
59 method for ammonia recovery in AD, either as pre-treatment (Bonmatí and Flotats 2003, Zhang  
60 et al. 2012), in side stream (Pedizzi et al. 2017, Serna-Maza et al. 2014), or post-treatment  
61 technology (Bonmatí and Flotats 2003, Gustin and Marinsek-Logar 2011). An alternative  
62 approach involves the electrochemical recovery of ammonium and other cations *via* a cation  
63 exchange membrane (Desloover et al. 2012), thus, allowing their recovery in a “clean” stream  
64 (De Vrieze et al. 2018). Both technologies are often combined for efficient ammonia recovery,  
65 as electrochemical extraction, followed by stripping/absorption enables the creation of a  
66 continuous concentration gradient (Desloover et al. 2015, Zhang and Angelidaki 2015).

67 The recovery of phosphorus in combination with AD is often problematic, because phosphates

68 precipitate with multivalent cations, such as  $\text{Ca}^{2+}$ ,  $\text{Mg}^{2+}$  and  $\text{Fe}^{2+}$ , say in the case of waste  
69 activated sludge (De Vrieze et al. 2016). Hence, the release and recovery of phosphorus from  
70 waste activated sludge requires alternative approaches, such as a microwave treatment (Liao et  
71 al. 2005), a free ammonia-based pre-treatment (Xu et al. 2018), or pressurized AD (Latif et al.  
72 2018). This allows the release of phosphate into the liquid phase, and the potential for  
73 subsequent recovery either through (1) struvite precipitation, to be used as slow-release  
74 fertilizer (Li et al. 2019, Vaneeckhaute et al. 2018), (2) electrodialysis, using an anion exchange  
75 (Ebbers et al. 2015) or bipolar (Shi et al. 2018) membrane system, or (3) a combination thereof  
76 (Zhang et al. 2013). These different technologies for the release of phosphate from the solid  
77 phase, however, require the input of chemicals and/or a coincide with an additional energy cost  
78 per unit of phosphorus released. Given the low and variable global market value of phosphorus,  
79 *i.e.*, € 350-1200 tonne<sup>-1</sup> P for phosphate rock with a  $\text{P}_2\text{O}_5$  content of 30% since 2010, alternative  
80 low-cost strategies for phosphate release should be targeted (Mayer et al. 2016).

81 Combining AD of waste activated sludge with *in situ* sulphate reduction by sulphate reducing  
82 bacteria could be an alternative approach for phosphate release into the liquid phase with no  
83 additional requirements in terms of energy or chemicals by using sulphate-rich waste streams  
84 as co-feedstock, such as vinasse or paper mill wastewater (Pokhrel and Viraraghavan 2004,  
85 Rodrigues Reis and Hu 2017). As the solubility product of multivalent cations with sulphides  
86 is conventionally lower than with phosphates, the *in situ* formation of sulphides could release  
87 phosphate into the liquid phase. The reduction of sulphate to sulphide during AD could,  
88 however, negatively impact methane production due to (1) competition between sulphate  
89 reducing bacteria and methanogens for “reducing power”, (2) direct inhibition of methanogens,  
90 due to  $\text{H}_2\text{S}$  toxicity, and (3) reduced trace metal bioavailability, due to precipitation with  
91 sulphides (Karhadkar et al. 1987, Paulo et al. 2015). Hence, accurate control of this “unwanted”  
92 sulphate reduction process, by monitoring the ingoing sulphate concentration and  $\text{H}_2\text{S}$  content

93 in the biogas, is essential to achieve a long-term stable integrated process of methane production  
94 and phosphorus release.

95 The key objective of this study was to obtain integrated energy recovery, through the production  
96 of biogas, and phosphate release from high-rate P-rich activated sludge during AD without the  
97 need for additional chemicals. Sulphate reduction by sulphate reducing bacteria, which is  
98 commonly considered an “unwanted process”, was carefully steered during AD operation to  
99 maximise the release of phosphate into the liquid phase, whilst limiting the impact of the  
100 sulphate reduction process on methane production.

101

## 102 2. Material and methods

### 103 2.1. Inoculum and feedstock

104 The high-rate activated sludge (A-sludge) that was used as feedstock during operation of the  
105 digesters was obtained as a single batch from the A-stage of the wastewater treatment plant  
106 Nieuwveer, Breda, the Netherlands (Table 1). The A-sludge was stored at 4°C until use. This  
107 wastewater treatment plant was operated at a short sludge retention time (< 2 days) to maximise  
108 the recovery of organics, according to the Adsorptions-Belebungsverfahren or AB-system  
109 principles (Boehnke et al. 1997, Meerburg et al. 2016). The inoculum for the anaerobic digesters  
110 was obtained from the sludge digesters at the full-scale wastewater treatment plant the  
111 Ossemeersen, Ghent, Belgium (Table 2).

112

### 113 2.2. Experimental design and operation

114 Six Schott bottles with a total volume of 1 L and a working volume of 800 mL were operated  
115 as lab-scale anaerobic digesters. The bottles were sealed with air-tight rubber stoppers and  
116 connected to a water displacement system *via* gas-tight PVC tubing to monitor biogas  
117 production (Figure S1). The liquid in this system was kept at a pH < 4.3 to avoid CO<sub>2</sub> in the  
118 biogas from dissolving. A Laboport<sup>®</sup> vacuum pump (KNF Group International, Aartselaar,  
119 Belgium) and glass sampling tube of 250 mL (Glasgerätebau Ochs, Lenglern, Germany) were  
120 used to collect samples for biogas composition analysis. The initial inoculum biomass  
121 concentration in each digester was fixed at 10 g VSS L<sup>-1</sup> (volatile suspended solids) by diluting  
122 the inoculum with tap water. The digesters were operated in a continuous stirred tank reactor  
123 mode with manual mixing, thus, the solids and hydraulic retention times were identical.  
124 Mesophilic conditions were maintained by operating the digesters in a temperature-controlled  
125 room at 34 ± 1°C. Digestate removal and feeding was carried out manually in fed-batch mode  
126 three times per week.

127 A start-up period of 14 days was implemented during which a sludge retention time of 40 days  
128 and an average organic loading rate of  $1 \text{ g COD L}^{-1} \text{ d}^{-1}$  (chemical oxygen demand) were applied  
129 to allow adaptation of the microbial community in the inoculum to the new feedstock. From  
130 day 15 till day 119 (end of the experiment), a hydraulic retention time of 20 days and an average  
131 organic loading rate of  $2 \text{ g COD L}^{-1} \text{ d}^{-1}$  were used. Until day 41, all six reactors were operated  
132 under identical conditions. From day 42 on, three biological replicates were subjected to  
133 sulphate addition at a predefined fixed sulphur to phosphorus molar ratio S:P of 2 by adding  
134  $\text{Na}_2\text{SO}_4$  to the feed (Sulphate digester). The other three biological reactors served as control  
135 digester with no sulphate addition (Control digester).  
136 Biogas production and composition were monitored three times per week, together with the  
137 digester pH. Biogas production values were reported at standard temperature (273 K) and  
138 pressure (101325 Pa) conditions (STP). The sulphate, phosphate, sodium, total ammonium and  
139 volatile fatty acids (VFA) concentrations were measured on a weekly basis. The free ammonia  
140 ( $\text{NH}_3$ ) concentration was calculated based on the pH and total ammonia concentration  
141 (Anthonisen et al. 1976). The overall salinity in the digesters was estimated through a weekly  
142 measurement of the conductivity. Samples for microbial community analysis were taken on day  
143 0 (inoculum and A-sludge), and day 42, 82 and 119 from each digester, and stored at  $-20^\circ\text{C}$   
144 until DNA extraction was performed.

145

### 146 2.3. Microbial community analysis

147 The frozen samples were subjected directly to DNA extraction with the ZymoBIOMICS™  
148 DNA Miniprep Kit (Zymo Research, Irvine, CA, USA), using a PowerLyzer® 24 Bench Top  
149 Bead-Based Homogenizer (MO BIO Laboratories, Inc, Carlsbad, CA, USA), and following the  
150 manufacturer's instructions. The quality of the DNA extracts was validated with agarose gel  
151 electrophoresis and through PCR analysis using the universal bacterial primers 341F (5'-

152 CCTACGGGNGGCWGCAG) and 785Rmod (5'- GACTACHVGGGTATCTAAKCC) that  
153 target the V3-V4 region of the 16S rRNA gene (Klindworth et al. 2013), following the protocol  
154 of Boon et al. (2002). The samples were sent to BaseClear B.V., Leiden, The Netherlands, for  
155 Illumina amplicon sequencing of the V3-V4 region of the 16S rRNA gene of the bacterial  
156 community on the MiSeq platform with V3 chemistry. The amplicon sequencing and data  
157 processing are described in detail in SI (S2). Real-time PCR analysis was carried out to quantify  
158 total bacteria, the methanogenic orders Methanobacteriales and Methanomicrobiales, and the  
159 methanogenic families Methanosaetaceae and Methanosarcinaceae, as described in SI (S3).

160

#### 161 2.4. Statistical analysis

162 A table with the relative abundances of the different bacterial OTUs (operational taxonomic  
163 units), together with their taxonomic assignment (Supplementary file 2) was generated  
164 following the amplicon data processing. All statistical analysis were carried out in R Studio  
165 version 3.3.1 (<http://www.r-project.org>) (R Development Core Team 2013). First, a repeated  
166 measures analysis of variance (ANOVA, *aov* function) was used to validate that the biological  
167 replicates showed no significant ( $P < 0.05$ ) differences in bacterial community composition.  
168 Next, the different samples were rescaled *via* to the “common-scale” approach (McMurdie and  
169 Holmes 2014) by means of which the proportions of all OTUs were taken, multiplied with the  
170 minimum sample size, and rounded to the nearest integer. Sampling depth of the different  
171 samples was evaluated through rarefaction curves (Figure S2) (Hurlbert 1971, Sanders 1968).  
172 The packages *vegan* (Oksanen et al. 2016) and *phyloseq* (McMurdie and Holmes 2013) were  
173 used for in-depth microbial community analysis.

174 A heatmap was created on the Phylum level (1% cut-off) with the *pheatmap* function (*pheatmap*  
175 package), and biological replicates were collated according to the method described by  
176 Connelly et al. (2017). The order-based Hill's numbers (Hill 1973) were used to estimate



177 differences in  $\alpha$ -diversity between the different digesters. These Hill's numbers represent  
178 richness (number of OTUs,  $H_0$ ), the exponential of the Shannon diversity index ( $H_1$ ) and the  
179 Inverse Simpson index ( $H_2$ ). The non-metric multidimensional scaling (NMDS) plots, based on  
180 the bacterial amplicon or methanogenic real-time PCR data, were constructed using the Bray-  
181 Curtis (Bray and Curtis 1957), Chao (Chao 1984), Jaccard, Kulczynski (Faith et al. 1987), and  
182 Mountford (Wolda 1981) distance measures. The OTUs with a significant difference ( $P < 0.05$ )  
183 in relative abundance between the Sulphate and Control digester were determined with the  
184 *DESeqDataSetFromMatrix* function from the DESeq2 package (Love et al. 2014)

185

## 186 2.5. Analytical techniques

187 Total solids (TS), total suspended solids (TSS), volatile suspended solids (VSS), volatile solids  
188 (VS), Kjeldahl nitrogen (TKN) and COD were measured according to Standard Methods  
189 (Greenberg et al. 1992). The total ammonium and sodium concentrations were measured on a  
190 761 Compact Ion Chromatograph (Metrohm, Herisau, Switzerland), which was equipped with  
191 a Metrosep C6-250/4.0 main column, a Metrosep C4 Guard/4.0 guard column and a  
192 conductivity detector. The eluent consisted of 1.7 mM  $\text{HNO}_3$  and 1.7 mM dipicolinic acid.  
193 Samples were centrifuged at 3000g for 3 min with a Labofuge 400 Heraeus centrifuge (Thermo  
194 Fisher Scientific Inc, Merelbeke, Belgium), filtered over a 0.45  $\mu\text{m}$  filter (type PA-45/25,  
195 Macherey-Nagel, Germany), and diluted with Milli-Q water to reach the desired concentration  
196 range for quantification between 1 and 100  $\text{mg L}^{-1}$ . The phosphate and sulphate concentrations  
197 were measured on a 930 Compact Ion Chromatograph Flex Deg (Metrohm, Herisau,  
198 Switzerland), with a Metrosep A supp 5 guard, A supp 5 150/4.0 main column and a  
199 conductivity detector. Sample preparation was identical to the sodium and ammonium  
200 concentrations, as well as the concentration range for quantification. The pH and conductivity  
201 were measured with a C532 pH and C833 conductivity meter (Consort, Turnhout, Belgium),

202 respectively. The biogas composition was measured with a Compact Gas Chromatograph  
203 (Global Analyser Solutions, Breda, The Netherlands), while the different VFA (C2-C8) were  
204 measured with a GC-2014 Gas Chromatograph (Shimadzu®, The Netherlands), as described in  
205 SI (S5). The total phosphorus and iron were analysed *via* Inductive Coupled Plasma Optical  
206 Emission Spectrometry – VARIAN Vista MPX, following destruction in a CEM Mars 6  
207 Microwave Digestion System (CEM Corporation, Matthews, NC, USA).

208

## 209 2.6. Data submission

210 The raw fastq files that served as a basis for the bacterial community analysis were deposited  
211 in the National Center for Biotechnology Information (NCBI) database (Accession number  
212 SRP185611).

213

## 214 3. Results

### 215 3.1. Digester performance

216 An efficient start-up was obtained for all six digesters, with a steady increase in biogas  
217 production, which reached a plateau around day 25 (Figure 1), and no residual VFA (Figure  
218 2a). From day 26 until day 42 (before sulphate addition was initiated in the Sulphate digester),  
219 a stable average methane production rate of  $610 \pm 60 \text{ mL CH}_4 \text{ L}^{-1} \text{ d}^{-1}$  was obtained over the six  
220 digesters. This corresponded with a COD conversion efficiency of the A-sludge to  $\text{CH}_4$  of  $86.9$   
221  $\pm 8.6 \%$ , indicating an efficient AD process.

222 The Control digester continued to show stable biogas production from day 43 till day 119 (end  
223 of the experiment), with an average methane production rate of  $628 \pm 103 \text{ mL CH}_4 \text{ L}^{-1} \text{ d}^{-1}$ ,  
224 which corresponded to a COD conversion efficiency of  $89.5 \pm 14.6 \%$  (Figure 1). Residual VFA  
225 concentrations did not exceed  $1.5 \text{ g COD L}^{-1}$  (Figure 2a), which corresponded to a maximum  
226 loss in COD via the effluent of  $3.8 \pm 1.3 \%$  on day 91. The main VFA fractions in the Control  
227 digester from day 43 on were acetate ( $70.7 \pm 9.5 \%$ ) and propionate ( $14.8 \pm 11.8 \%$ ). The pH  
228 remained stable throughout the entire process, with an average value of  $7.29 \pm 0.10$  from day  
229 43 till day 119 (Figure 2b). Total salinity, as measured *via* conductivity, did not exceed  $11.9 \pm$   
230  $0.1 \text{ mS cm}^{-1}$  (Figure S3a), and the sodium concentration remained below  $0.3 \text{ g Na}^+ \text{ L}^{-1}$  (Figure  
231 S3b). The total ammonium concentration, with a maximum value of  $1.34 \pm 0.02 \text{ g N L}^{-1}$  on day  
232 77 (Figure S3c), and free ammonia concentration, with a maximum value of  $32 \pm 2 \text{ mg N L}^{-1}$   
233 on day 77 (Figure S3d), did not reach potentially inhibitory values.

234 The addition of sulphate to the feed initially did not negatively impact methane production, as  
235 an average methane production rate of  $613 \pm 114 \text{ mL CH}_4 \text{ L}^{-1} \text{ d}^{-1}$  and a corresponding COD  
236 conversion efficiency of  $87.4 \pm 16.3 \%$  were obtained between day 43 and 61 (Figure 1). After  
237 day 61, methane production rate slowly, but steadily decreased to reach a minimum value of  
238  $210 \text{ mL CH}_4 \text{ L}^{-1} \text{ d}^{-1}$  on day 77. From day 77 on, methane production rate again slowly increased

239 to reach a new steady state from day 98 on, with an average methane production rate of  $445 \pm$   
240  $53 \text{ mL CH}_4 \text{ L}^{-1} \text{ d}^{-1}$  and a corresponding COD conversion efficiency of  $63.5 \pm 7.6 \%$  (Figure 1).  
241 This decreasing trend in methane production and subsequent increase towards a new steady  
242 state, though at lower methane production rates, is reflected in the VFA concentration profile.  
243 The total VFA concentration increased from  $0.8 \pm 0.9 \text{ g COD L}^{-1}$  on day 62 to  $7.5 \pm 1.4 \text{ g COD}$   
244  $\text{L}^{-1}$  on day 84, but decreased again to  $3.6 \pm 2.1 \text{ g COD L}^{-1}$  on day 119 (Figure 2a). This increase  
245 in VFA concentration was reflected in a decrease of the pH, though a minimum value of only  
246  $6.95 \pm 0.13$  was reached on day 84 (Figure 2b), which is still within the optimal range for stable  
247 AD. Total salinity was slightly higher, related to the addition of  $\text{Na}_2\text{SO}_4$ , with a maximum  
248 conductivity value of  $15.1 \pm 0.2 \text{ mS cm}^{-1}$  on day 70 and maximum sodium concentration of  $2.1$   
249  $\text{g Na}^+ \text{ L}^{-1}$  on day 112 (Figure S3), but this was insufficient to cause direct AD process failure.  
250 In addition, neither total ammonium concentration, with a maximum value of  $1.27 \pm 0.01 \text{ g N}$   
251  $\text{L}^{-1}$  on day 62, nor free ammonia concentration, with a maximum value of  $40 \pm 3 \text{ g N L}^{-1}$  on day  
252 62, reached potentially inhibitory concentrations.

253

### 254 3.2. Phosphate release

255 The key objective of this research was to evaluate to which extent sulphate reduction by  
256 sulphate reducing bacteria could assist the release of phosphate from A-sludge, related to the  
257 lower solubility product of multivalent cations with sulphides than with phosphates. In the  
258 Control digester, the phosphate concentration in the liquid phase slowly increased during the  
259 start-up from  $34 \pm 8 \text{ mg PO}_4^{3-} \text{ L}^{-1}$  on day 7 to an average value of  $256 \pm 38 \text{ mg PO}_4^{3-} \text{ L}^{-1}$  between  
260 day 56 and 119 (end of the experiment) (Figure 3a). Based on the total P-content of the A-  
261 sludge feedstock (Table 1), this corresponded with an average release of  $12.9 \pm 2.0 \%$  of total  
262 P in the liquid phase as phosphate. As no sulphate was added to the Control digester, the residual  
263 sulphate concentration in the liquid phase remained below  $25 \text{ mg SO}_4^{2-} \text{ L}^{-1}$ , except for day 0

264 (Figure 3b). No H<sub>2</sub>S could be detected in the biogas of the Control digesters, except for one  
265 replicate on day 98 (0.14% H<sub>2</sub>S) and day 117 (0.31 % H<sub>2</sub>S).  
266 Following the addition of Na<sub>2</sub>SO<sub>4</sub> in the Sulphate digester on day 42, the phosphate  
267 concentration in the liquid phase increased rapidly from only 106 ± 29 mg PO<sub>4</sub><sup>3-</sup> L<sup>-1</sup> on day 42  
268 to 1120 ± 280 mg PO<sub>4</sub><sup>3-</sup> L<sup>-1</sup> on day 56 (Figure 3a). An average phosphate concentration of 1160  
269 ± 130 mg PO<sub>4</sub><sup>3-</sup> L<sup>-1</sup> was maintained between day 56 and day 119. This corresponded with an  
270 average release of 58.7 ± 12.9 % of total P into the liquid phase as phosphate, which is a factor  
271 4.5 higher than the Control digester. The addition of sulphate, however, also resulted in an  
272 increased residual sulphate concentration in the liquid phase. A first initial peak of 298 ± 43 mg  
273 SO<sub>4</sub><sup>2-</sup> L<sup>-1</sup> could be observed immediately following the first sulphate addition on day 49 (Figure  
274 3b). A second lower peak of 150 ± 97 mg SO<sub>4</sub><sup>2-</sup> L<sup>-1</sup> was detected on day 84 after which the  
275 sulphate concentration in the liquid phase decreased to similar values as the Control digester.  
276 In contrast to the Control digester, H<sub>2</sub>S was detected in the biogas at multiple time points  
277 between day 89 and 119, with values up to 0.50 % H<sub>2</sub>S in the biogas, which corresponded with  
278 maximum 8.2 % of the sulphur added to the ingoing feedstock.

279

### 280 3.3. Microbial community analysis

#### 281 3.3.1. Bacterial community

282 Amplicon sequencing of the bacterial community yielded an average of 17,570 ± 6,505 reads  
283 and 1,431 ± 400 OTUs per sample (including singletons). Following removal of singletons and  
284 normalisation according to the common-scale approach, this was reduced to an average of 9,631  
285 ± 183 reads and 557 ± 115 OTUs per sample. No significant differences (repeated measures  
286 ANOVA, *P* < 0.0001) in bacterial community composition were detected between the  
287 biological replicates.

288 The bacterial community consisted mainly of the Bacteroidetes (24.4 ± 5.6 %), Firmicutes (26.4

289  $\pm 6.5$  %), Proteobacteria ( $13.8 \pm 6.7$  %) and Chloroflexi ( $9.1 \pm 6.5$  %) phyla, averaged over all  
290 samples, excluding the feedstock A-sludge (Figure 4). The A-sludge was mainly comprised of  
291 Proteobacteria (62.7 %) and Firmicutes (26.6 %) phyla. A clear increase in the Proteobacteria  
292 phylum could be observed in the Sulphate digester, reaching  $17.6 \pm 1.6$  % on day 82 and  $19.5$   
293  $\pm 3.1$  % on day 119 relative abundance, in contrast to  $7.5 \pm 0.7$  % on day 82 and  $8.6 \pm 0.9$  %  
294 on day 119 relative abundance in the Control digester (Figure 4). In total 222 OTUs (0.9 % of  
295 all OTUs), considering all time points, showed a significant difference  
296 (DESeqDataSetFromMatrix,  $P < 0.05$ ) in relative abundance between the Sulphate and Control  
297 digester. The difference in the Proteobacteria phylum between the Sulphate and Control  
298 digester mainly related to OTU00025 (*Pseudomonas*,  $P < 0.0001$ ) and OTU00057 (*Rhodoferrax*,  
299  $P < 0.0001$ ) (Table 3). The sulphate reducers OTU00198 (*Desulfovibrio*,  $P < 0.0001$ ),  
300 OTU00219 (*Desulfobulbus*,  $P < 0.0001$ ) and OTU00393 (*Desulfomicrobium*,  $P < 0.0001$ ) also  
301 showed a significantly higher relative abundance in the Sulphate than in the Control digester  
302 (Table 3).

303 The  $\alpha$ -diversity analysis on the different levels of diversity ( $H_0$ ,  $H_1$  and  $H_2$ ) did not reveal clear  
304 differences between the digesters (Figure S4). In contrast,  $\beta$ -diversity analysis, based on the  
305 Bray-Curtis distance measure, revealed clear divergence in the bacterial community  
306 composition in the Sulphate digester on day 82 and 119, compared to the Control digester  
307 (Figure 5a). As sulphate addition only started on day 42, no differences in community  
308 composition were observed yet between the Control and Sulphate digester. This result was  
309 confirmed for the Jaccard, Chao, Kulczynski, and Mountford distance measures (Figure S5).

310

### 311 3.3.2. Methanogenic community

312 Real-time PCR analysis of the total bacteria and the different methanogenic groups revealed an  
313 overall dominance of the bacteria in absolute abundance, as the methanogens comprised only

314 0.26 ± 0.12 % of the microbial community, averaged over all samples, excluding the feedstock  
315 A-sludge. Both the A-sludge and Inoculum were dominated by the Methanosaetaceae (Figure  
316 6). This was also reflected in the Control digester during the entire experiment, though an  
317 increase in relative abundance of the Methanomicrobiales could be observed at the cost of the  
318 Methanosaetaceae on day 119. The Sulphate digester showed a similar pattern as the Control  
319 digester, though on day 119, a strong increase in the relative abundance of the  
320 Methanosarcinaceae could be observed, which coincided with a reduced relative abundance of  
321 the Methanosaetaceae and Methanomicrobiales. The  $\beta$ -diversity analysis of the methanogenic  
322 community, based on the Bray-Curtis distance measure, confirmed this shift in the  
323 methanogenic community (Figure 5b). This shift was confirmed for the Jaccard and Kulczynski  
324 distance measures (Figure S5).  
325

## 326 4. Discussion

327 The stimulation of sulphate reducing bacteria by supplementing the A-sludge feedstock with  
328 sulphate enabled the release of phosphate into the liquid phase. The methanogenesis process  
329 was not strongly affected, yet, lower methane production rates and increased concentrations of  
330 residual VFA were observed. The bacterial and archaeal community demonstrated a clear shift  
331 in composition in response to the sulphate addition, with a clear increase in sulphate reducing  
332 genera.

333

### 334 4.1. Sulphate reduction enables phosphate release from high-rate activated sludge

335 The addition of sulphate during the AD process resulted in an increase in the phosphate  
336 concentration in the liquid phase up to a factor 4.5, compared to the Control digester. Even  
337 though, on average only  $58.7 \pm 12.9$  % of total P in the A-sludge could be released into the  
338 liquid phase. As residual sulphate remained behind in the liquid phase and H<sub>2</sub>S was measured  
339 in the biogas in the Sulphate digester, this indicates that the sulphate reduction potential was  
340 not fully used, especially since an S:P molar ratio of 2 was applied. This S:P ratio of 2 was  
341 chosen to provide enough sulphides for phosphate release, yet, at the same time avoid too severe  
342 negative effects on methanogenesis, related to sulphide formation. A similar observation was  
343 made when subjecting manure to acidification either prior to or after AD, *i.e.*, only about 60 %  
344 of total P could be released into the liquid phase (De Vrieze et al. 2019). Organic phosphorus,  
345 such as DNA components, cannot be released into the liquid phase by the direct effects of  
346 sulphate reduction, and requires pre-treatment methods, such as a free ammonia pre-treatment  
347 (Xu et al. 2018) or other methods that improve sludge biodegradability (Carrère et al. 2010).  
348 The effect of such a pre-treatment, however, will be limited. This is because of the already high  
349 conversion efficiency of COD, and, thus, also the organic phosphorus components, to methane  
350 in this study ( $86.9 \pm 8.6$  %), as also reported earlier (De Vrieze et al. 2013, De Vrieze et al.



351 2015, Ge et al. 2013, Meerburg et al. 2015). In addition, the economic feasibility of such a pre-  
352 treatment strategy depends on the increased COD conversion efficiency (Ma et al. 2011), which  
353 is anticipated to be limited, and phosphorus release. A strategy that could actively and  
354 simultaneously benefit both the COD conversion efficiency and phosphate release, such as a  
355 nitrous acid pre-treatment (Pijuan et al. 2012, Wei et al. 2018), potentially could be  
356 economically feasible.

357 The addition of sulphate resulted in a so-called “inhibited steady-state”, as described previously  
358 for ammonia toxicity (Nielsen and Angelidaki 2008), and salt toxicity (De Vrieze et al. 2014).  
359 Such an inhibited steady-state is characterized by elevated concentrations of residual VFA, and  
360 a lower, yet, steady methane production. This allows two different potential approaches for  
361 further process optimisation. A first option involves accurate control of sulphate dosing, based  
362 on online monitoring of residual VFA concentrations, residual sulphate concentrations, H<sub>2</sub>S in  
363 the gas phase, and/or methane production rates to sustain an optimal combined methanogenesis  
364 and phosphate release process. Alternatively, sulphate addition can be increased to selectively,  
365 but completely inhibit the sensitive methanogens (Karhadkar et al. 1987), thus, evolving  
366 towards fermentation with the objective to directly produce VFA instead of methane, combined  
367 with phosphate release. Both approaches require an alternative way of process engineering for  
368 targeted resource recovery of which technical and economic aspects will determine the case-  
369 specific application potential.

370

371 4.2. The microbial community response reflects a shift in response to sulphate addition

372 The accumulation of VFA and decrease in methane production in the Sulphate digester  
373 coincided with a clear shift in the microbial community. The increase in relative abundance of  
374 confirmed sulphate reducing bacteria in the Sulphate digester, relative to the Control digester  
375 is to be expected, yet, their relative abundance, except for OTU00198 in one of the biological

376 replicates on day 119, remained below 1 % of the bacterial community. One could question the  
377 involvement of these sulphate reducing bacteria in the overall process, yet, given their ability  
378 to reduce sulphate and complete absence in the different biological replicates of the Control  
379 digester on day 82 and 119, their involvement in the sulphate reduction process is apparent. The  
380 potentially important role of low-abundant OTUs in AD has been indicated frequently (Guo et  
381 al. 2015, Theuerl et al. 2018, Vanwonterghem et al. 2016), and is also reflected in the present  
382 study, with an overall low relative abundance of the methanogens, which are nonetheless  
383 essential in the AD process.

384 The methanogenic community in the Sulphate digester showed a clear shift towards an  
385 increased relative and absolute abundance of the Methanosarcinaceae at the expense of the  
386 Methanosaetaceae, in contrast to the Control digester. The overall higher tolerance of  
387 *Methanosarcina* sp., compared to *Methanosaeta* sp., to different stressors in AD (Conklin et al.  
388 2006, De Vrieze et al. 2012), explains this shift, in response to the formation of sulphides. A  
389 similar shift has been observed in other studies, in response to multiple stressors, although the  
390 methane production pathway by the *Methanosarcina* sp., *i.e.*, either acetoclastic or  
391 hydrogenotrophic methanogenesis, may vary (De Vrieze et al. 2012, Lins et al. 2014, Lu et al.  
392 2013, McMahon et al. 2001, Poirier et al. 2016, Venkiteshwaran et al. 2016). The apparent  
393 “inhibited steady state” in this study, as also observed previously, thus, seems to be a  
394 consequence of the shift from a *Methanosaeta* sp. to *Methanosarcina* sp. domination, and  
395 reflects their different metabolic features.

396

#### 397 4.3. The cost of phosphate release through sulphate reduction

398 The release of phosphate into the liquid phase due to sulphide formation was up to a factor 4.5  
399 higher than when no sulphate was added to the feedstock. This enables an integrated  
400 valorisation of the A-sludge, with combined energy (through biogas) and nutrient (through

401 phosphate) recovery. For this purpose, the “inhibited steady-state” phase (day 89-119) of the  
402 Sulphate digester ( $428 \pm 53 \text{ mL CH}_4 \text{ L}^{-1} \text{ d}^{-1}$ ) was compared to the Control digester ( $611 \pm 110$   
403  $\text{mL CH}_4 \text{ L}^{-1} \text{ d}^{-1}$ ) during that same period, which corresponded with a  $29.9 \pm 15.3 \%$  lower  
404 methane production in the Sulphate compared to the Control digester. An electrical efficiency  
405 of  $40 \%$  for the CHP unit (Deublein and Steinhauser 2008, Szarka et al. 2013), a higher heating  
406 value of  $9.95 \text{ kWh m}^{-3} \text{ CH}_4$ , a  $95 \%$  recovery of methane from the digester, and a hydraulic  
407 retention time of 20 days were assumed. At a current electricity market price of  $\text{€ } 0.10 \text{ kWh}^{-1}$   
408 (De Vrieze et al. 2016), this amounts  $\text{€ } 126 \text{ m}^{-3} \text{ year}^{-1}$  for the Control and  $\text{€ } 89 \text{ m}^{-3} \text{ year}^{-1}$  for the  
409 Sulphate digester per unit digester volume for electricity from biogas, thus, a deficit of  $\text{€ } 37 \text{ m}^{-3}$   
410  $\text{year}^{-1}$  related to sulphate reduction. Projected electricity market prices of  $\text{€ } 0.03 \text{ kWh}^{-1}$  by  
411 2020-2025, and even down to  $\text{€ } 0.01 \text{ kWh}^{-1}$  by 2030-2040 (Fraunhofer 2015, van Wijk et al.  
412 2017) reduce this deficit to  $\text{€ } 8 \text{ m}^{-3} \text{ year}^{-1}$  &  $\text{€ } 3 \text{ m}^{-3} \text{ year}^{-1}$ , respectively. Based on the market price of  
413 phosphate rock of  $\text{€ } 350\text{-}1200 \text{ tonne}^{-1} \text{ P}$  since 2010 (Mayer et al. 2016), this yields a potential  
414 revenue of  $\text{€ } 0.5 \text{ m}^{-3} \text{ year}^{-1}$  for the Control and  $2.3 \text{ m}^{-3} \text{ year}^{-1}$  for the Sulphate digester at a value  
415 of  $\text{€ } 350 \text{ tonne}^{-1} \text{ P}$ . At a value of  $\text{€ } 1200 \text{ tonne}^{-1} \text{ P}$ , this revenue increases to  $\text{€ } 1.8 \text{ m}^{-3}$  &  $7.9 \text{ m}^{-3}$   
416  $\text{year}^{-1}$  for the Control and Sulphate digester, respectively. This indicates that the deficit due to  
417 the decrease in methane production can be at least partially covered by the revenue from  
418 phosphorus recovery, but additional resource recovery strategies and/or advanced control of the  
419 sulphate reduction process will be essential.

420 The integrated approach of this study that makes use of sulphate reduction during AD for  
421 combined energy and phosphorus recovery faces additional challenges. First, the release of  
422 phosphate into the liquid phase allows subsequent recovery, yet, phosphate recovery  
423 technologies, such as struvite precipitation, result in additional costs and product quality issues.  
424 For example, phosphorus recovery from pig manure through struvite crystallisation coincides  
425 with an electricity cost of  $\text{€ } 0.5 \text{ tonne}^{-1} \text{ pig manure}$  (De Vrieze et al. 2019, Flotats et al. 2011).

426 Second, the increase in H<sub>2</sub>S in the biogas requires additional desulfurization, for which both  
427 physicochemical and biological techniques can be used (Abatzoglou and Boivin 2009), to a  
428 recommended value < 0.025 % (Weiland 2010) before it can be sent to the CHP unit. Third, the  
429 presence of residual VFA in the liquid phase, with an average value of  $4.9 \pm 1.4$  g COD L<sup>-1</sup>  
430 between day 89-119, necessitates additional (aerobic) effluent polishing.

431 These challenges can also be considered opportunities. The H<sub>2</sub>S in the biogas can be recovered  
432 as elemental sulphur *via* different techniques (Pandey and Malhotra 1999). The phosphate and  
433 residual VFA can be recovered in a combined electrodialysis or membrane electrolysis  
434 approach (Andersen et al. 2014, De Vrieze et al. 2018). Alternatively, the AD process can be  
435 shifted from methanogenesis to direct VFA production, thus, avoiding biogas desulfurization  
436 and focusing on the liquid phase. Hence, an integrated approach that combines the release and  
437 recovery of phosphorus with other resource recovery strategies for the valorisation of organic  
438 waste and side streams could find its way towards future full-scale applications.

439

440 **5. Conclusions**

441 The exploitation of sulphate reduction for the release of phosphorus from energy-rich sludge  
442 increased the phosphate concentration in the liquid phase with a factor 4.5. The sulphate  
443 reduction process pushed the anaerobic digestion process to an inhibited steady state, as  
444 reflected in both operational and microbial parameters, with reduced, yet, stable methane  
445 production rates. Phosphate can be recovered in an economically feasible way, but only in  
446 combination with energy, organics or other resources for integrated valorisation of energy-rich  
447 sludge.

448

449 **Acknowledgments**

450 Jo De Vrieze is supported as postdoctoral fellow by the Research Foundation Flanders (FWO-  
451 Vlaanderen). The authors would like to thank Tim Lacoere for his assistance with the molecular  
452 analysis, and Cindy Law, Amanda Luther and Inka Vanwonderghem for carefully reading the  
453 manuscript. The authors also kindly acknowledge Harry Vrins from Waterschap Brabantse  
454 Delta for his assistance with the A-sludge collection.

455

## 456 References

- 457 Abatzoglou, N. and Boivin, S. (2009) A review of biogas purification processes. *Biofuels*  
458 *Bioproducts & Biorefining-Biofpr* 3(1), 42-71.
- 459 Acosta, N. and De Vrieze, J. (2018) *Biogenesis of Hydrocarbons*. Stams, A.J.M. and Sousa, D.  
460 (eds), pp. 1-19, Springer International Publishing, Cham.
- 461 Andersen, S.J., Hennebel, T., Gildemyn, S., Coma, M., Desloover, J., Berton, J., Tsukamoto,  
462 J., Stevens, C. and Rabaey, K. (2014) Electrolytic Membrane Extraction Enables Production of  
463 Fine Chemicals from Biorefinery Sidestreams. *Environmental Science & Technology* 48(12),  
464 7135-7142.
- 465 Anthonisen, A.C., Loehr, R.C., Prakasam, T.B.S. and Srinath, E.G. (1976) Inhibition of  
466 Nitrification by Ammonia and Nitrous Acid. *Journal Water Pollution Control Federation* 48(5),  
467 835-852.
- 468 Appels, L., Baeyens, J., Degreve, J. and Dewil, R. (2008) Principles and potential of the  
469 anaerobic digestion of waste-activated sludge. *Progress in Energy and Combustion Science*  
470 34(6), 755-781.
- 471 Björn, A., Shakeri Yekta, S., Ziels, R.M., Gustafsson, K., Svensson, B.H. and Karlsson, A.  
472 (2017) Feasibility of OFMSW co-digestion with sewage sludge for increasing biogas  
473 production at wastewater treatment plants. *Euro-Mediterranean Journal for Environmental*  
474 *Integration* 2(1), 21.
- 475 Boehnke, B., Diering, B. and Zuckut, S.W. (1997) Cost-effective wastewater treatment process  
476 for removal of organics and nutrients. *Water-Engineering & Management* 144(7), 18-21.
- 477 Bonmatí, A. and Flotats, X. (2003) Air stripping of ammonia from pig slurry: characterisation  
478 and feasibility as a pre- or post-treatment to mesophilic anaerobic digestion. *Waste*  
479 *Management* 23(3), 261-272.
- 480 Boon, N., De Windt, W., Verstraete, W. and Top, E.M. (2002) Evaluation of nested PCR-  
481 DGGE (denaturing gradient gel electrophoresis) with group-specific 16S rRNA primers for the  
482 analysis of bacterial communities from different wastewater treatment plants. *Fems*  
483 *Microbiology Ecology* 39(2), 101-112.
- 484 Bray, J.R. and Curtis, J.T. (1957) An Ordination of the Upland Forest Communities of Southern  
485 Wisconsin. *Ecological Monographs* 27(4), 326-349.
- 486 Carrère, H., Dumas, C., Battimelli, A., Batstone, D.J., Delgenès, J.P., Steyer, J.P. and Ferrer, I.  
487 (2010) Pretreatment methods to improve sludge anaerobic degradability: A review. *Journal of*  
488 *Hazardous Materials* 183(1), 1-15.
- 489 Chao, A. (1984) Nonparametric Estimation of the Number of Classes in a Population.  
490 *Scandinavian Journal of Statistics* 11(4), 265-270.
- 491 Conklin, A., Stensel, H.D. and Ferguson, J. (2006) Growth kinetics and competition between  
492 *Methanosarcina* and *Methanosaeta* in mesophilic anaerobic digestion. *Water Environment*  
493 *Research* 78(5), 486-496.
- 494 Connelly, S., Shin, S.G., Dillon, R.J., Ijaz, U.Z., Quince, C., Sloan, W.T. and Collins, G. (2017)  
495 *Bioreactor Scalability: Laboratory-Scale Bioreactor Design Influences Performance, Ecology,*  
496 *and Community Physiology in Expanded Granular Sludge Bed Bioreactors*. *Frontiers in*  
497 *Microbiology* 8, 15.
- 498 De Vrieze, J., Arends, J.B.A., Verbeeck, K., Gildemyn, S. and Rabaey, K. (2018) Interfacing  
499 anaerobic digestion with (bio)electrochemical systems: Potentials and challenges. *Water*  
500 *Research* 146, 244-255.
- 501 De Vrieze, J., Colica, G., Pintucci, C., Sarli, J., Pedizzi, C., Willeghems, G., Bral, A., Varga,  
502 S., Prat, D., Peng, L., Spiller, M., Buysse, J., Colsen, J., Benito, O., Carballa, M. and Vlaeminck,  
503 S.E. (2019) Resource recovery from pig manure via an integrated approach: A technical and  
504 economic assessment for full-scale applications. *Bioresource Technology* 272, 582-593.

- 505 De Vrieze, J., De Lathouwer, L., Verstraete, W. and Boon, N. (2013) High-rate iron-rich  
506 activated sludge as stabilizing agent for the anaerobic digestion of kitchen waste. *Water*  
507 *Research* 47(11), 3732-3741.
- 508 De Vrieze, J., Gildemyn, S., Arends, J.B.A., Vanwonterghem, I., Verbeke, K., Boon, N.,  
509 Verstraete, W., Tyson, G.W., Hennebel, T. and Rabaey, K. (2014) Biomass retention on  
510 electrodes rather than electrical current enhances stability in anaerobic digestion. *Water*  
511 *Research* 44(1), 211-221.
- 512 De Vrieze, J., Hennebel, T., Boon, N. and Verstraete, W. (2012) *Methanosarcina*: The  
513 rediscovered methanogen for heavy duty biomethanation. *Bioresource Technology* 112, 1-9.
- 514 De Vrieze, J., Plovie, K., Verstraete, W. and Boon, N. (2015) Co-digestion of molasses or  
515 kitchen waste with high-rate activated sludge results in a diverse microbial community with  
516 stable methane production. *Journal of Environmental Management* 152(0), 75-82.
- 517 De Vrieze, J., Smet, D., Klok, J., Colsen, J., Angenent, L.T. and Vlaeminck, S.E. (2016)  
518 Thermophilic sludge digestion improves energy balance and nutrient recovery potential in full-  
519 scale municipal wastewater treatment plants. *Bioresource Technology* 218, 1237-1245.
- 520 Desloover, J., De Vrieze, J., de Vijver, M.V., Mortelmans, J., Rozendal, R. and Rabaey, K.  
521 (2015) Electrochemical Nutrient Recovery Enables Ammonia Toxicity Control and Biogas  
522 Desulfurization in Anaerobic Digestion. *Environmental Science & Technology* 49(2), 948-955.
- 523 Desloover, J., Woldeyohannis, A.A., Verstraete, W., Boon, N. and Rabaey, K. (2012)  
524 Electrochemical Resource Recovery from Digestate to Prevent Ammonia Toxicity during  
525 Anaerobic Digestion. *Environmental Science & Technology* 46(21), 12209-12216.
- 526 Deublein, D. and Steinhauser, A. (2008) *Biogas from Waste and Renewable Resources: An*  
527 *Introduction*, Wiley.
- 528 Ebbers, B., Ottosen, L.M. and Jensen, P.E. (2015) Electrodialytic treatment of municipal  
529 wastewater and sludge for the removal of heavy metals and recovery of phosphorus.  
530 *Electrochimica Acta* 181, 90-99.
- 531 Faith, D.P., Minchin, P.R. and Belbin, L. (1987) Compositional dissimilarity as a robust  
532 measure of ecological distance. *Vegetatio* 69(1-3), 57-68.
- 533 Flotats, X., Foged, H.L., Bonmati, A., Palatsi, J., Magri, A. and Schelde, K.M. (2011) Manure  
534 processing technologies. Technical Report No. II concerning "Manure Processing Activities in  
535 Europe" to the European Commission, Directorate-General Environment., p. 184.
- 536 Fraunhofer, I.S.E. (2015) Current and Future Cost of Photovoltaics. Long-term Scenarios for  
537 Market Development, System Prices and LCOE of Utility-Scale PV Systems. Study on behalf  
538 of Agora Energiewende.
- 539 Ge, H., Batstone, D.J. and Keller, J. (2013) Operating aerobic wastewater treatment at very  
540 short sludge ages enables treatment and energy recovery through anaerobic sludge digestion.  
541 *Water Research* 47(17), 6546-6557.
- 542 Greenberg, A.E., Clesceri, L.S. and Eaton, A.D. (1992) *Standard Methods for the Examination*  
543 *of Water and Wastewater* American Public Health Association Publications, Washington.
- 544 Guo, J., Peng, Y., Ni, B.-J., Han, X., Fan, L. and Yuan, Z. (2015) Dissecting microbial  
545 community structure and methane-producing pathways of a full-scale anaerobic reactor  
546 digesting activated sludge from wastewater treatment by metagenomic sequencing. *Microbial*  
547 *Cell Factories* 14, 33-33.
- 548 Gustin, S. and Marinsek-Logar, R. (2011) Effect of pH, temperature and air flow rate on the  
549 continuous ammonia stripping of the anaerobic digestion effluent. *Process Safety and*  
550 *Environmental Protection* 89(1), 61-66.
- 551 Hartmann, H. and Ahring, B.K. (2006) Strategies for the anaerobic digestion of the organic  
552 fraction of municipal solid waste: an overview. *Water Science and Technology* 53(8), 7-22.
- 553 Hill, M.O. (1973) Diversity and Evenness: A Unifying Notation and Its Consequences. *Ecology*  
554 54(2), 427-432.



- 555 Holm-Nielsen, J.B., Al Seadi, T. and Oleskowicz-Popiel, P. (2009) The future of anaerobic  
556 digestion and biogas utilization. *Bioresource Technology* 100(22), 5478-5484.
- 557 Hurlbert, S.H. (1971) The Nonconcept of Species Diversity: A Critique and Alternative  
558 Parameters. *Ecology* 52(4), 577-586.
- 559 Karhadkar, P.P., Audic, J.M., Faup, G.M. and Khanna, P. (1987) Sulfide and sulfate inhibition  
560 of methanogenesis. *Water Research* 21(9), 1061-1066.
- 561 Klindworth, A., Pruesse, E., Schweer, T., Peplies, J., Quast, C., Horn, M. and Glockner, F.O.  
562 (2013) Evaluation of general 16S ribosomal RNA gene PCR primers for classical and next-  
563 generation sequencing-based diversity studies. *Nucleic Acids Research* 41(1), 11.
- 564 Latif, M.A., Mehta, C.M. and Batstone, D.J. (2018) Enhancing soluble phosphate concentration  
565 in sludge liquor by pressurised anaerobic digestion. *Water Research* 145, 660-666.
- 566 Li, B., Boiarkina, I., Yu, W., Huang, H.M., Munir, T., Wang, G.Q. and Young, B.R. (2019)  
567 Phosphorous recovery through struvite crystallization: Challenges for future design. *Science of  
568 the Total Environment* 648, 1244-1256.
- 569 Liao, P.H., Wong, W.T. and Lo, K.V. (2005) Release of phosphorus from sewage sludge using  
570 microwave technology. *Journal of Environmental Engineering and Science* 4(1), 77-81.
- 571 Lins, P., Reitschuler, C. and Illmer, P. (2014) *Methanosarcina* spp., the key to relieve the start-  
572 up of a thermophilic anaerobic digestion suffering from high acetic acid loads. *Bioresource  
573 Technology* 152, 347-354.
- 574 Love, M.I., Huber, W. and Anders, S. (2014) Moderated estimation of fold change and  
575 dispersion for RNA-seq data with DESeq2. *Genome Biology* 15(12), 38.
- 576 Lu, F., Hao, L.P., Guan, D.X., Qi, Y.J., Shao, L.M. and He, P.J. (2013) Synergetic stress of  
577 acids and ammonium on the shift in the methanogenic pathways during thermophilic anaerobic  
578 digestion of organics. *Water Research* 47(7), 2297-2306.
- 579 Ma, J.X., Duong, T.H., Smits, M., Verstraete, W. and Carballa, M. (2011) Enhanced  
580 biomethanation of kitchen waste by different pre-treatments. *Bioresource Technology* 102(2),  
581 592-599.
- 582 Mata-Alvarez, J., Dosta, J., Mace, S. and Astals, S. (2011) Codigestion of solid wastes: A  
583 review of its uses and perspectives including modeling. *Critical Reviews in Biotechnology*  
584 31(2), 99-111.
- 585 Mayer, B.K., Baker, L.A., Boyer, T.H., Drechsel, P., Gifford, M., Hanjra, M.A., Parameswaran,  
586 P., Stoltzfus, J., Westerhoff, P. and Rittmann, B.E. (2016) Total Value of Phosphorus Recovery.  
587 *Environmental Science & Technology* 50(13), 6606-6620.
- 588 McMahan, K.D., Stroot, P.G., Mackie, R.I. and Raskin, L. (2001) Anaerobic codigestion of  
589 municipal solid waste and biosolids under various mixing conditions - II: Microbial population  
590 dynamics. *Water Research* 35(7), 1817-1827.
- 591 McMurdie, P.J. and Holmes, S. (2013) phyloseq: An R Package for Reproducible Interactive  
592 Analysis and Graphics of Microbiome Census Data. *Plos One* 8(4), e61217.
- 593 McMurdie, P.J. and Holmes, S. (2014) Waste Not, Want Not: Why Rarefying Microbiome Data  
594 Is Inadmissible. *Plos Computational Biology* 10(4), 12.
- 595 Meerburg, F.A., Boon, N., Van Winckel, T., Vercamer, J.A.R., Nopens, I. and Vlaeminck, S.E.  
596 (2015) Toward energy-neutral wastewater treatment: A high-rate contact stabilization process  
597 to maximally recover sewage organics. *Bioresource Technology* 179, 373-381.
- 598 Meerburg, F.A., Vlaeminck, S.E., Roume, H., Seuntjens, D., Pieper, D.H., Jauregui, R.,  
599 Vilchez-Vargas, R. and Boon, N. (2016) High-rate activated sludge communities have a  
600 distinctly different structure compared to low-rate sludge communities, and are less sensitive  
601 towards environmental and operational variables. *Water Research* 100, 137-145.
- 602 Nielsen, H.B. and Angelidaki, I. (2008) Strategies for optimizing recovery of the biogas process  
603 following ammonia inhibition. *Bioresource Technology* 99(17), 7995-8001.
- 604 Oksanen, J., Blanchet, F.G., Kindt, R., Legendre, P., Minchin, P.R., O'Hara R.B., Simpson,

- 605 G.L., Solymos, P., Stevens, M.H.H. and Wagner, H. (2016) Vegan: Community ecology  
606 package. R package version 2.3-4.
- 607 Pandey, R.A. and Malhotra, S. (1999) Desulfurization of Gaseous Fuels with Recovery of  
608 Elemental Sulfur: An Overview. *Critical Reviews in Environmental Science and Technology*  
609 29(3), 229-268.
- 610 Paulo, L.M., Stams, A.J.M. and Sousa, D.Z. (2015) Methanogens, sulphate and heavy metals:  
611 a complex system. *Reviews in Environmental Science and Bio-Technology* 14(4), 537-553.
- 612 Pedizzi, C., Lema, J.M. and Carballa, M. (2017) Enhancing thermophilic co-digestion of  
613 nitrogen-rich substrates by air side-stream stripping. *Bioresource Technology* 241, 397-405.
- 614 Pijuan, M., Wang, Q., Ye, L. and Yuan, Z. (2012) Improving secondary sludge biodegradability  
615 using free nitrous acid treatment. *Bioresource Technology* 116, 92-98.
- 616 Poirier, S., Desmond-Le Quemener, E., Madigou, C., Bouchez, T. and Chapleur, O. (2016)  
617 Anaerobic digestion of biowaste under extreme ammonia concentration: Identification of key  
618 microbial phylotypes. *Bioresource Technology* 207, 92-101.
- 619 Pokhrel, D. and Viraraghavan, T. (2004) Treatment of pulp and paper mill wastewater—a  
620 review. *Science of the Total Environment* 333(1), 37-58.
- 621 R Development Core Team (2013) R: A Language and Environment for Statistical Computing.  
622 3.0 ed. Vienna, Austria: R Foundation for Statistical Computing.
- 623 Rodrigues Reis, C.E. and Hu, B. (2017) Vinasse from Sugarcane Ethanol Production: Better  
624 Treatment or Better Utilization? *Frontiers in Energy Research* 5(7).
- 625 Sanders, H.L. (1968) Marine Benthic Diversity: A Comparative Study. *American Naturalist*  
626 102(925), 243-282.
- 627 Serna-Maza, A., Heaven, S. and Banks, C.J. (2014) Ammonia removal in food waste anaerobic  
628 digestion using a side-stream stripping process. *Bioresource Technology* 152, 307-315.
- 629 Shi, L., Hu, Y., Xie, S., Wu, G., Hu, Z. and Zhan, X. (2018) Recovery of nutrients and volatile  
630 fatty acids from pig manure hydrolysate using two-stage bipolar membrane electrodialysis.  
631 *Chemical Engineering Journal* 334, 134-142.
- 632 Szarka, N., Scholwin, F., Trommler, M., Jacobi, H.F., Eichhorn, M., Ortwein, A. and Thran, D.  
633 (2013) A novel role for bioenergy: A flexible, demand-oriented power supply. *Energy* 61, 18-  
634 26.
- 635 Theuerl, S., Klang, J., Heiermann, M. and De Vrieze, J. (2018) Marker microbiome clusters are  
636 determined by operational parameters and specific key taxa combinations in anaerobic  
637 digestion. *Bioresource Technology* 263, 128-135.
- 638 van Wijk, A., van der Roest, E. and Boere, J. (2017) *Solar power to the people*, IOS Press BV,  
639 Amsterdam.
- 640 Vaneckhaute, C., Belia, E., Meers, E., Tack, F.M.G. and Vanrolleghem, P.A. (2018) Nutrient  
641 recovery from digested waste: Towards a generic roadmap for setting up an optimal treatment  
642 train. *Waste Management* 78, 385-392.
- 643 Vanwongerghem, I., Jensen, P.D., Rabaey, K. and Tyson, G.W. (2016) Genome-centric  
644 resolution of microbial diversity, metabolism and interactions in anaerobic digestion.  
645 *Environmental Microbiology* 18(9), 3144-3158.
- 646 Venkiteshwaran, K., Milferstedt, K., Hamelin, J. and Zitomer, D.H. (2016) Anaerobic digester  
647 bioaugmentation influences quasi steady state performance and microbial community. *Water*  
648 *Research* 104, 128-136.
- 649 Wei, W., Wang, Q., Zhang, L., Laloo, A., Duan, H., Batstone, D.J. and Yuan, Z. (2018) Free  
650 nitrous acid pre-treatment of waste activated sludge enhances volatile solids destruction and  
651 improves sludge dewaterability in continuous anaerobic digestion. *Water Research* 130, 13-19.
- 652 Weiland, P. (2010) Biogas production: current state and perspectives. *Applied Microbiology*  
653 *and Biotechnology* 85(4), 849-860.
- 654 Wolda, H. (1981) Similarity indices, sample size and diversity. *Oecologia* 50(3), 296-302.

655 Xu, Q.X., Liu, X.R., Wang, D.B., Wu, Y.X., Wang, Q.L., Liu, Y.W., Li, X.M., An, H.X., Zhao,  
656 J.W., Chen, F., Zhong, Y., Yang, Q. and Zeng, G.M. (2018) Free ammonia-based pretreatment  
657 enhances phosphorus release and recovery from waste activated sludge. *Chemosphere* 213,  
658 276-284.

659 Zhang, L., Lee, Y.W. and Jahng, D. (2012) Ammonia stripping for enhanced biomethanization  
660 of piggery wastewater. *Journal of Hazardous Materials* 199, 36-42.

661 Zhang, Y., Desmidt, E., Van Looveren, A., Pinoy, L., Meesschaert, B. and Van der Bruggen,  
662 B. (2013) Phosphate Separation and Recovery from Wastewater by Novel Electrodialysis.  
663 *Environmental Science & Technology* 47(11), 5888-5895.

664 Zhang, Y.F. and Angelidaki, I. (2015) Submersible microbial desalination cell for simultaneous  
665 ammonia recovery and electricity production from anaerobic reactors containing high levels of  
666 ammonia. *Bioresource Technology* 177, 233-239.

667

668 **Tables:**

669 **Table 1** Main characteristics of the high-rate energy-rich A-sludge (n=3). TS = total solids, VS  
670 = volatile solids, COD = chemical oxygen demand, VFA = volatile fatty acids, TAN = total  
671 ammonia nitrogen, TKN = Kjeldahl nitrogen, FW = fresh weight.

| Parameter    | Unit                       | A-sludge    |
|--------------|----------------------------|-------------|
| pH           | -                          | 5.64 ± 0.01 |
| TS           | g TS kg <sup>-1</sup> FW   | 35.4 ± 1.6  |
| VS           | g VS kg <sup>-1</sup> FW   | 28.4 ± 1.3  |
| Total COD    | g COD kg <sup>-1</sup> FW  | 40.1 ± 2.1  |
| Conductivity | mS cm <sup>-1</sup>        | 2.04 ± 0.02 |
| Total VFA    | mg COD kg <sup>-1</sup> FW | 0 ± 0       |
| TAN          | mg N kg <sup>-1</sup> FW   | 28 ± 0      |
| TKN          | mg N kg <sup>-1</sup> FW   | 1571 ± 225  |
| Total P      | mg P kg <sup>-1</sup> FW   | 659 ± 28    |
| COD:N ratio  | -                          | 25.5 ± 3.9  |
| COD:P ratio  | -                          | 60.8 ± 4.1  |
| TS:VS ratio  | -                          | 1.25 ± 0.08 |
| COD:VS ratio | -                          | 1.41 ± 0.10 |

672

673 **Table 2** Main characteristics of the inoculum sludge (n=3). TSS = total suspended solids, VSS  
674 = volatile suspended solids, COD = chemical oxygen demand, TAN = total ammonia nitrogen,  
675 VFA = volatile fatty acids, FA = free ammonia nitrogen.

| Parameter       | Unit                   | Inoculum     |
|-----------------|------------------------|--------------|
| pH              | -                      | 7.48 ± 0.07  |
| TSS             | g TSS L <sup>-1</sup>  | 44.6 ± 0.07  |
| VSS             | g VSS L <sup>-1</sup>  | 23.7 ± 0.11  |
| Conductivity    | mS cm <sup>-1</sup>    | 10.51 ± 0.02 |
| Total VFA       | mg COD L <sup>-1</sup> | 0 ± 0        |
| TAN             | mg N L <sup>-1</sup>   | 572 ± 26     |
| FA <sup>1</sup> | mg N L <sup>-1</sup>   | 18 ± 1       |

676 <sup>1</sup>The free ammonia (FA) content was calculated based on the TAN concentration, pH and  
677 temperature in the full-scale installation (Anthonisen et al. 1976).

678

679 **Table 3** Overview of the key OTUs with their relative abundance in the bacterial community  
680 that show a significantly different relative abundance (DESeqDataSetFromMatrix,  $P < 0.0001$ )  
681 between the Sulphate and Control digesters.

| OTU      | Genus                   | Relative abundance (%) |           |
|----------|-------------------------|------------------------|-----------|
|          |                         | Sulphate               | Control   |
| Otu00025 | <i>Pseudomonas</i>      | 3.5 ± 4.3              | 0.0 ± 0.0 |
| Otu00057 | <i>Rhodoferrax</i>      | 2.0 ± 0.6              | 0.2 ± 0.2 |
| Otu00198 | <i>Desulfovibrio</i>    | 0.8 ± 0.6              | 0.0 ± 0.0 |
| Otu00219 | <i>Desulfobulbus</i>    | 0.1 ± 0.1              | 0.0 ± 0.0 |
| Otu00393 | <i>Desulfomicrobium</i> | 0.3 ± 0.2              | 0.0 ± 0.0 |

682

683 **Figures:**

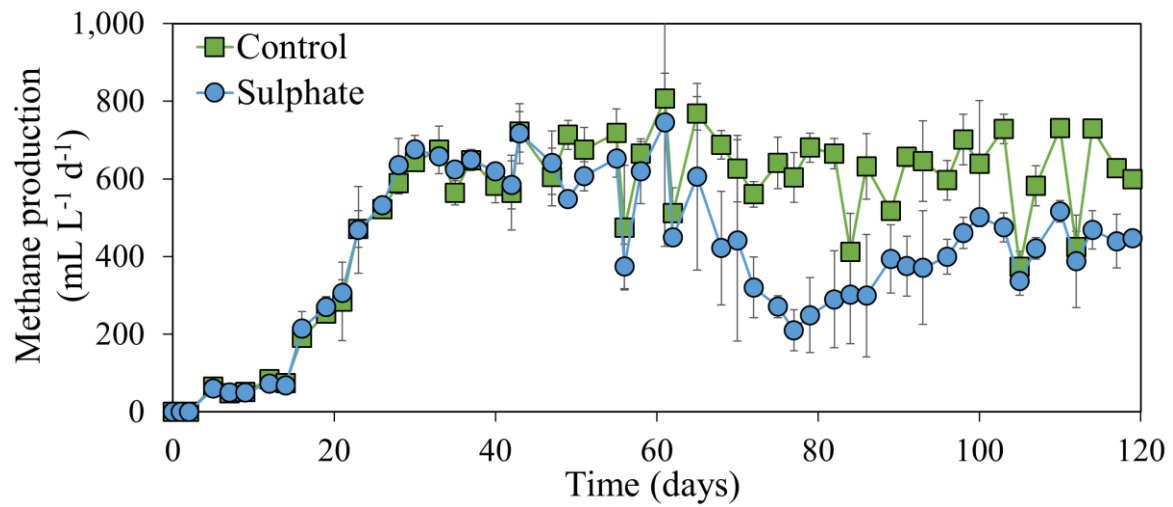

684

685 **Figure 1** Methane production in function of time in the Control and Sulphate digester. Average  
686 values of the biological replicates (n=3) are presented, and the error bars represent standard  
687 deviations.

688

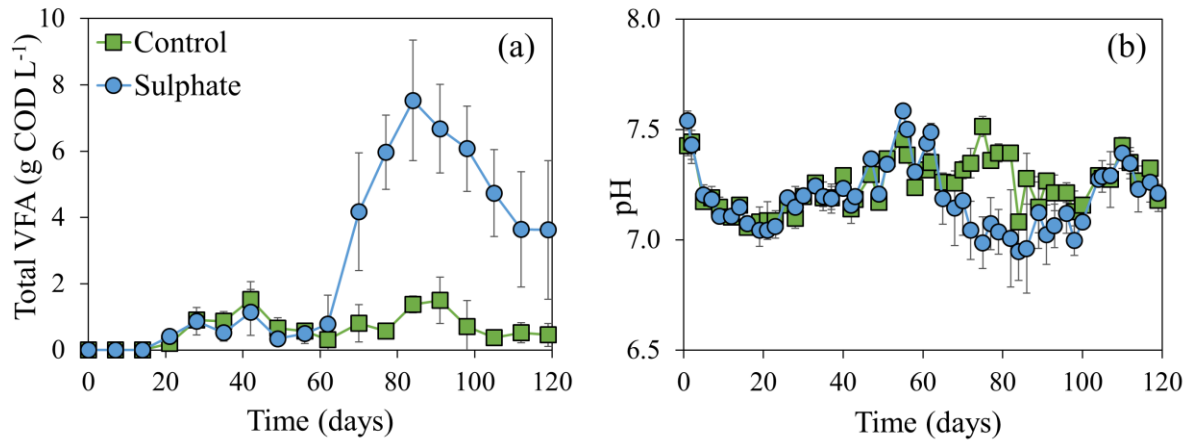

689

690 **Figure 2** Total volatile fatty acid (VFA) concentration (a) and pH (b) in function of time in the

691 Control and Sulphate digester. Average values of the biological replicates (n=3) are presented,

692 and the error bars represent standard deviations.

693



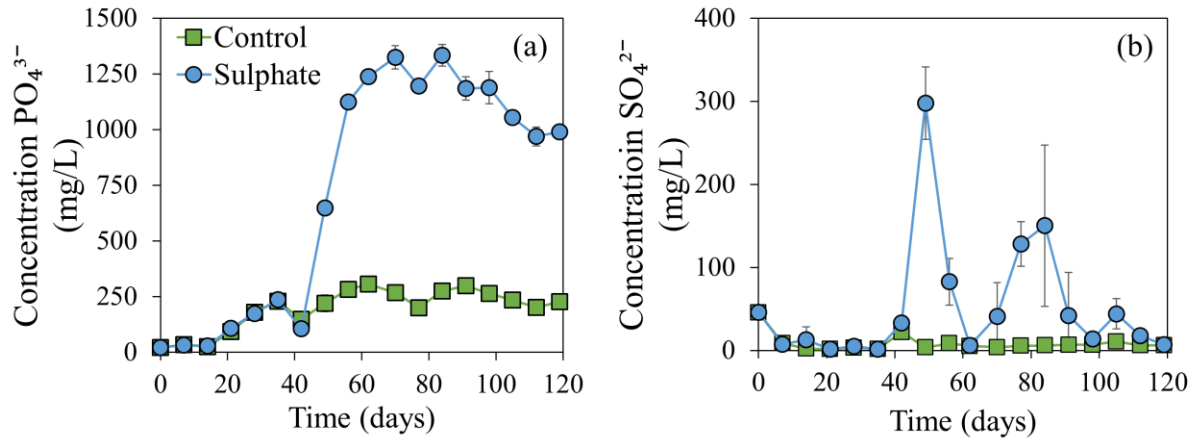

694

695 **Figure 3** Phosphate (a) and sulphate (b) concentration in function of time in the Control and

696 Sulphate digester. Average values of the biological replicates (n=3) are presented, and the error

697 bars represent standard deviations.

698

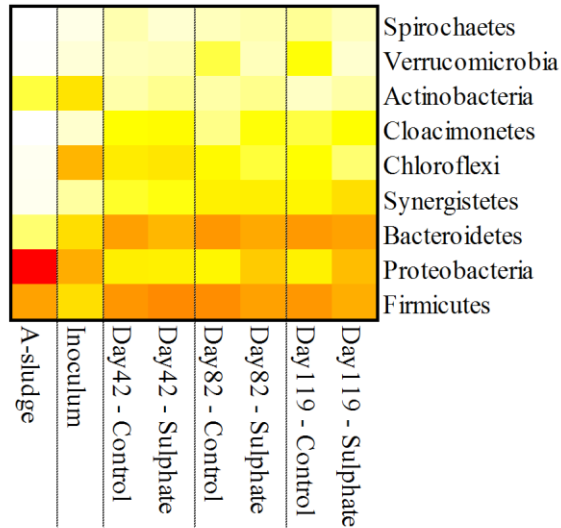

699

700 **Figure 4** Heatmap showing the relative abundance of the bacterial community at the phylum  
701 level in the A-sludge feedstock, the inoculum and on day 42, 82 and 119 for both digesters.  
702 Weighted average values of the biological replicates are presented. The colour scale ranges  
703 from 0 (white) to 60% (red) relative abundance.

704

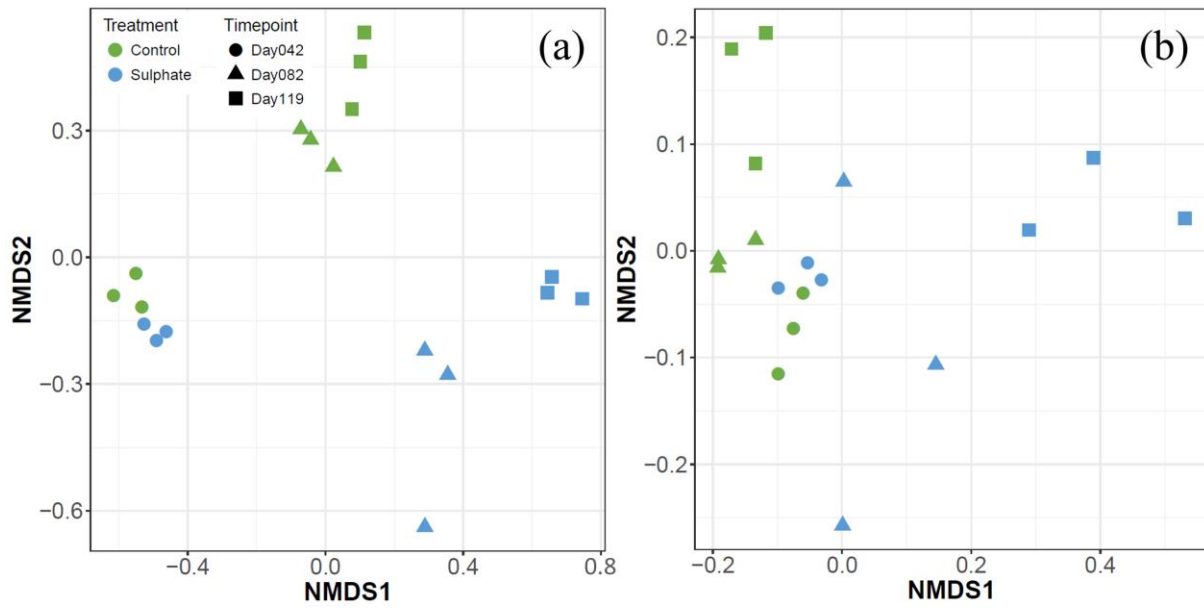

705

706 **Figure 5** Non-metric multidimensional distance scaling (NMDS) analysis of the Bray-Curtis  
707 distance measure of the bacterial (a), based on amplicon sequencing data at OTU level (stress  
708 = 0.059), and methanogenic (b) community (stress = 0.072), based on real-time PCR data.  
709 Different colours and symbols are used for different digesters and timepoints, respectively.

710

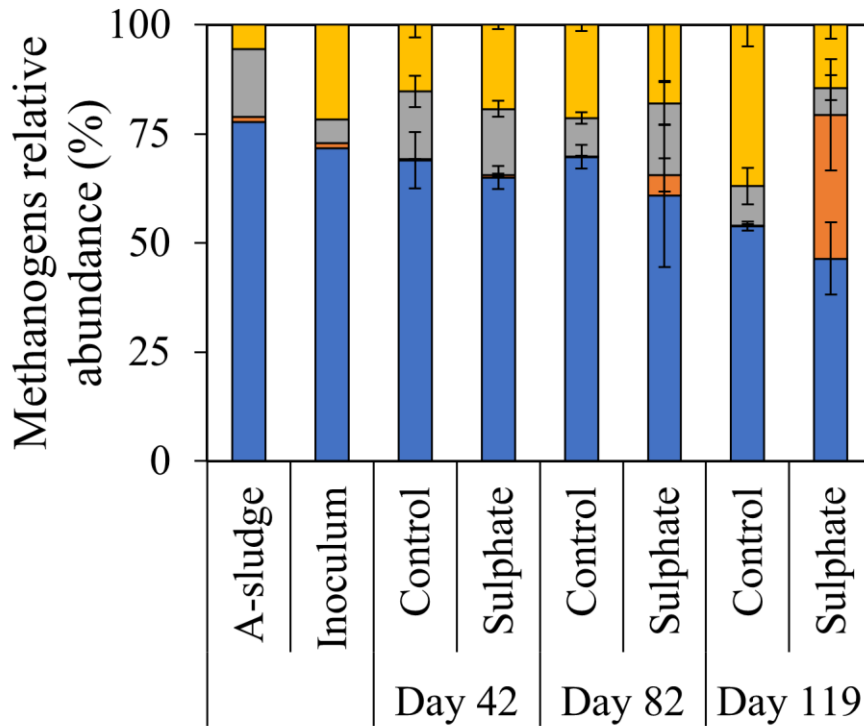

711

712 **Figure 6** Relative abundance (%) of the Methanosaetaceae (blue, ■), Methanosarcinaceae  
713 (orange, ■), Methanobacteriales (grey, ■) and Methanomicrobiales (yellow, ■) in the  
714 methanogenic community of the A-sludge feedstock, the inoculum and on day 42, 82 and 119  
715 for both digesters. Average values of the biological replicates (n=3) are presented, and the error  
716 bars represent standard deviations.
